# Supplementary material for: Conformational stability, spectroscopic signatures and biological interactions of proton pump inhibitor drug lansoprazole based on structural motifs
Source: Royal Society of Chemistry journal article supplement (doi:10.1039/c7ra00130d), 2017-01-01
Supplement: c7ra00130d1.pdf [file c7ra00130d1.pdf]

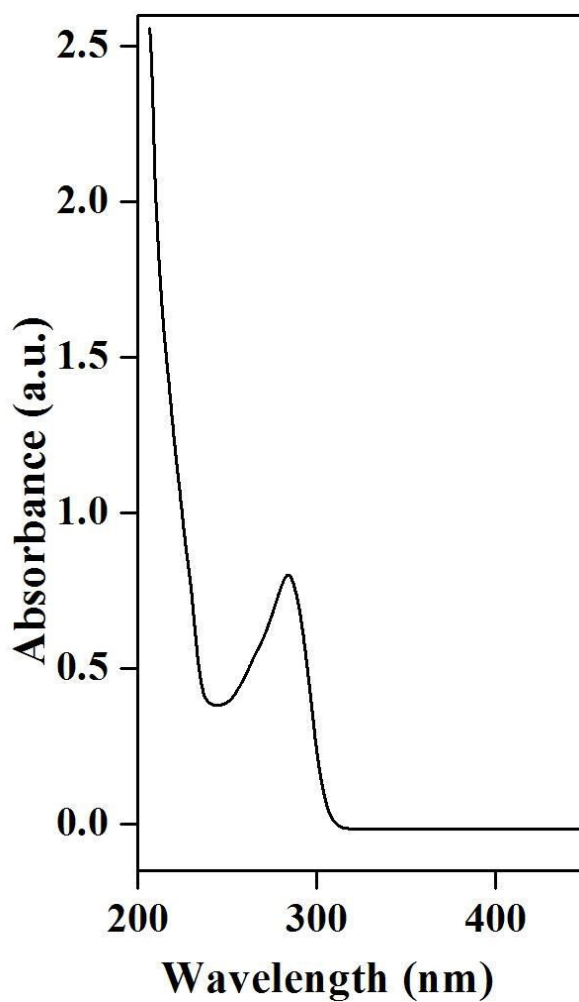

Fig. S1: UV-vis transmission spectrum of LSP in Ethanol solution

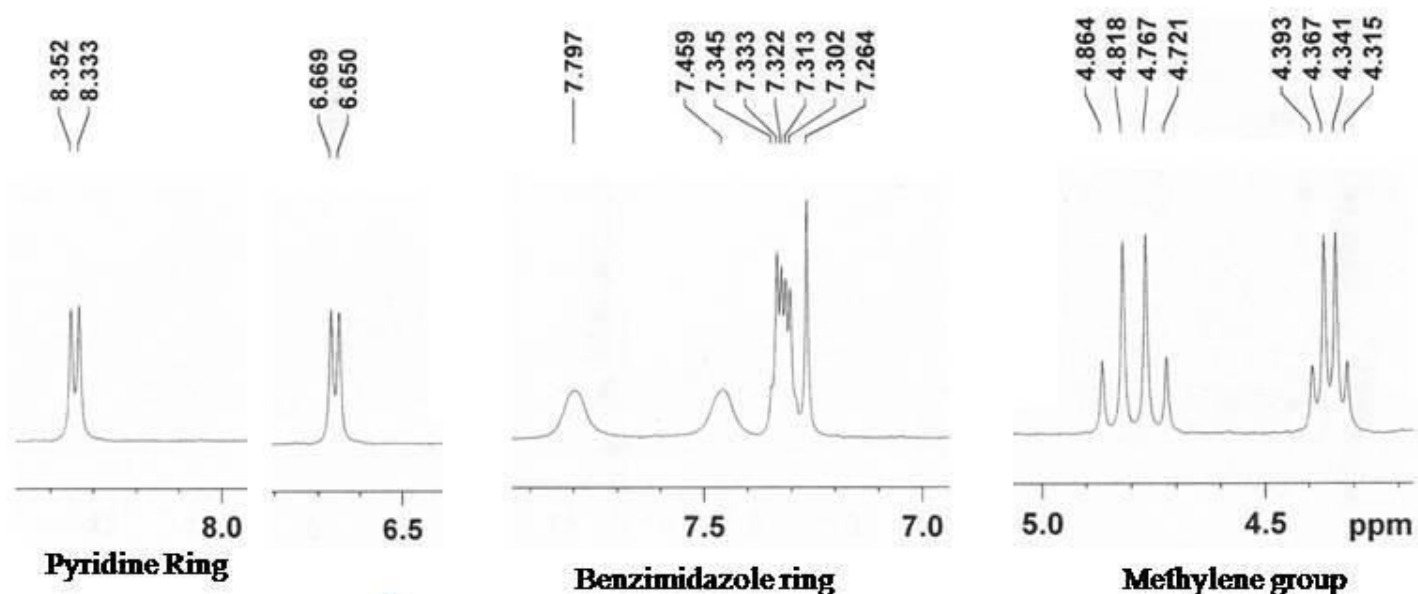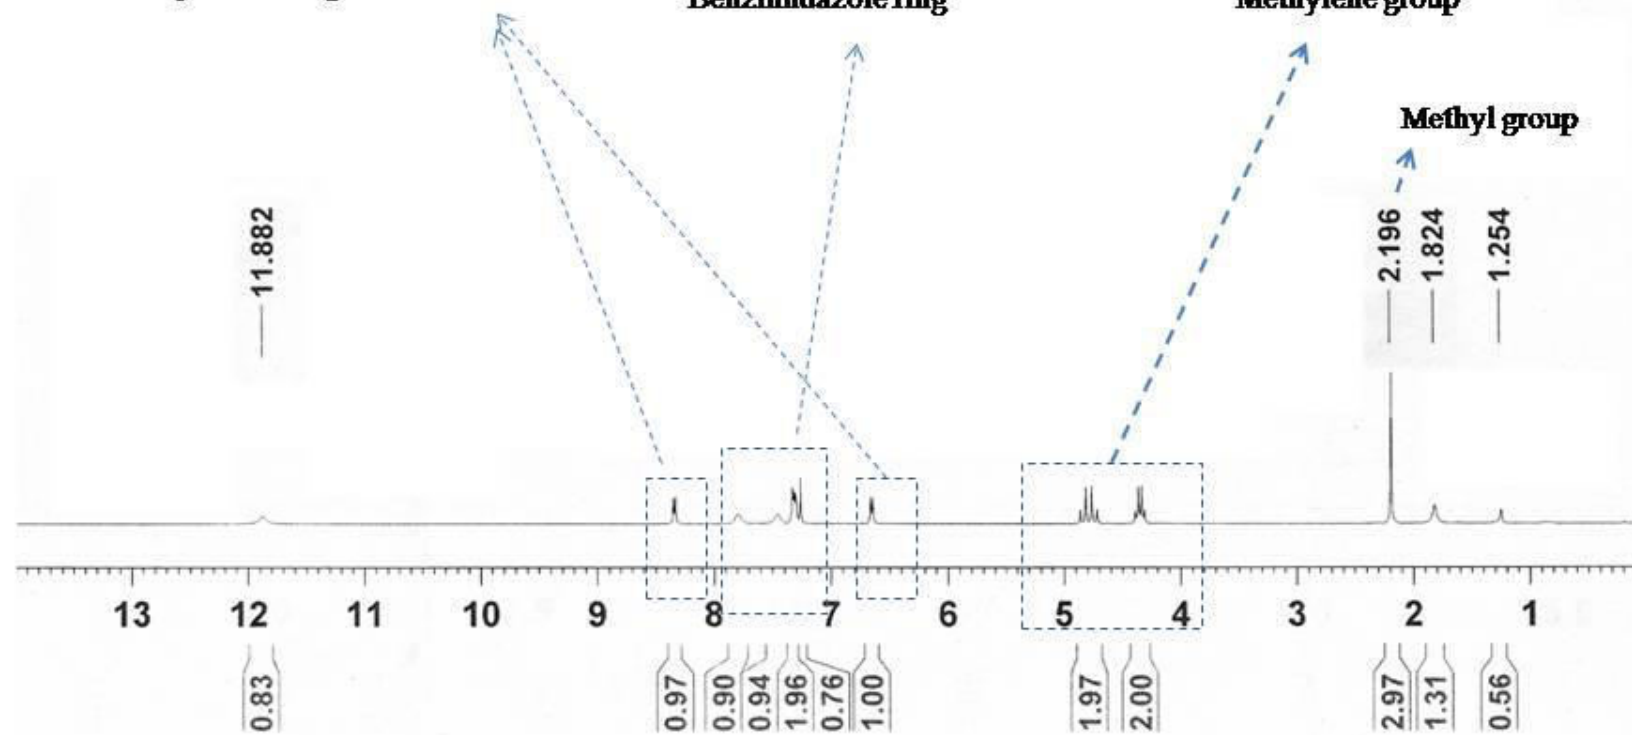

Fig. S2:  $^1\text{H}$  NMR spectrum of LSP

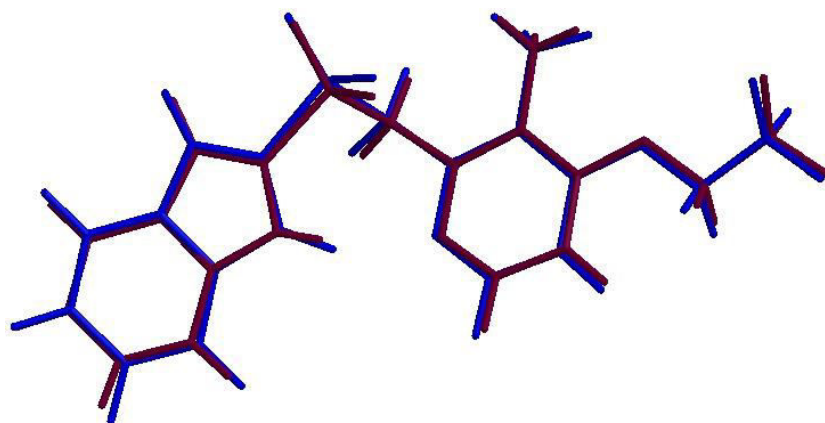

Fig. S3: Comparison of the experimental (in red) and the optimized (in blue) structure of LSP (hydrogen atoms are not shown)

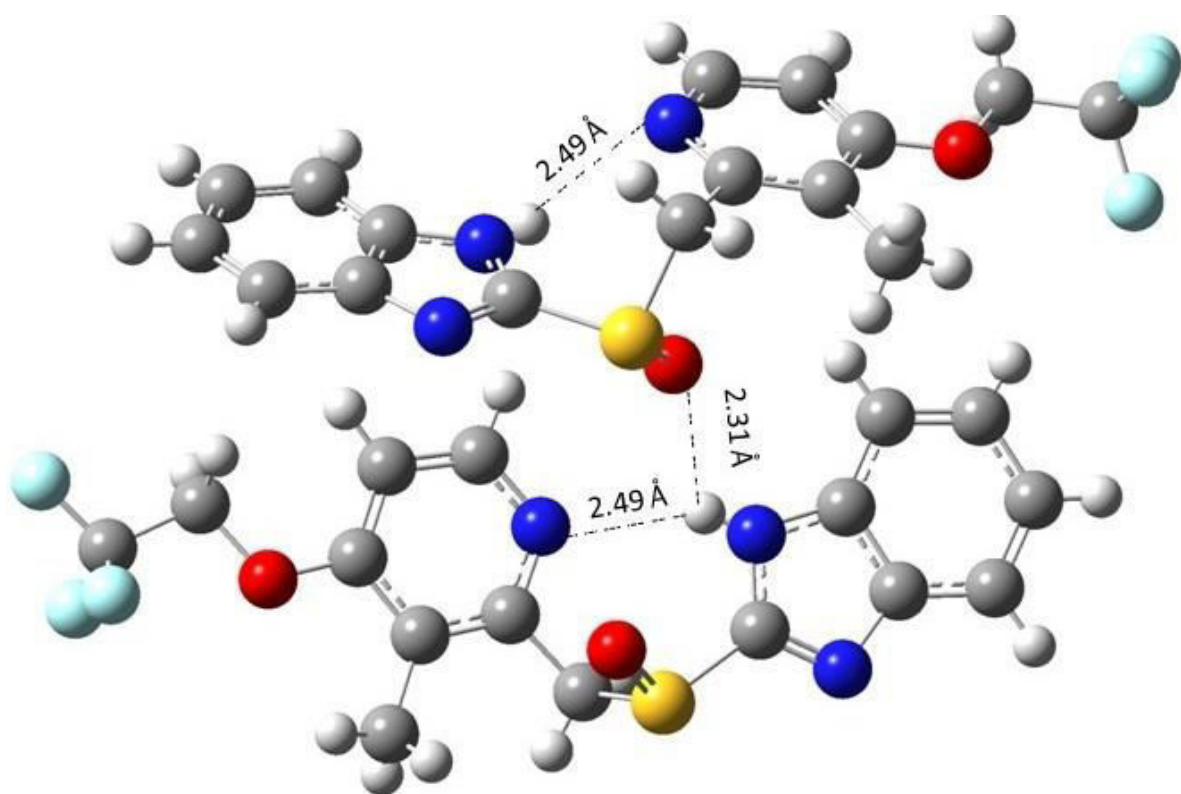

Fig. S4: Dimer structure of LSP exhibiting intra and intermolecular interactions.

### Conformer 1

D1= -146.67729°, D2= -88.98879°  
D3= -88.51928°, D4= -179.39567°  
Energy= -1630.10021899 a.u.

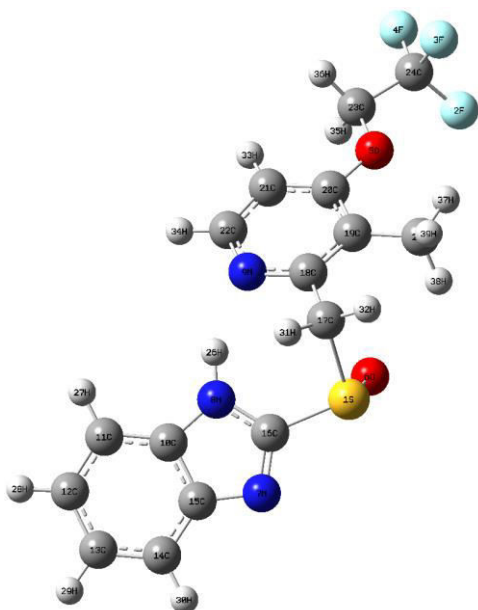

### Conformer 2

D1= -64.23331°, D2= 116.83465°  
D3= -103.44262°, D4= 98.48725°  
Energy= -1630.09952096 a.u.

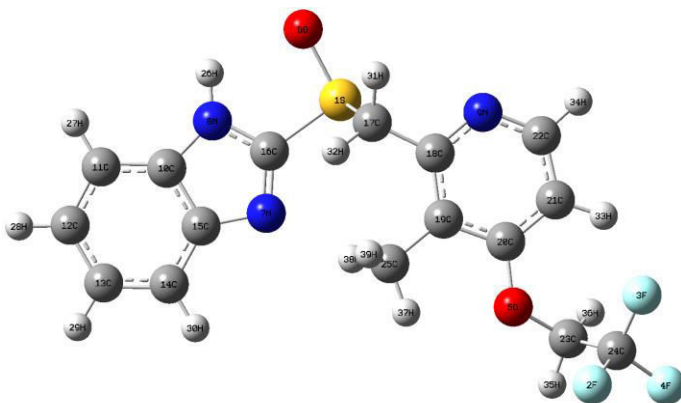

### Conformer 3

D1= -69.10399°, D2= -76.57527°  
D3= -82.92743° D4= 178.15086°  
Energy= -1630.10121361 a.u.

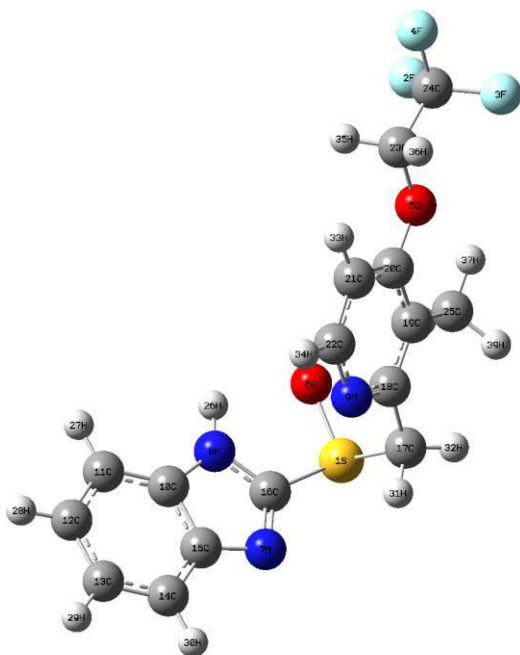

### Conformer 4

D1= -63.80397°, D2= 117.59324°  
D3= -103.42753°, D4= 179.65972°  
Energy= -1630.09916402 a.u.

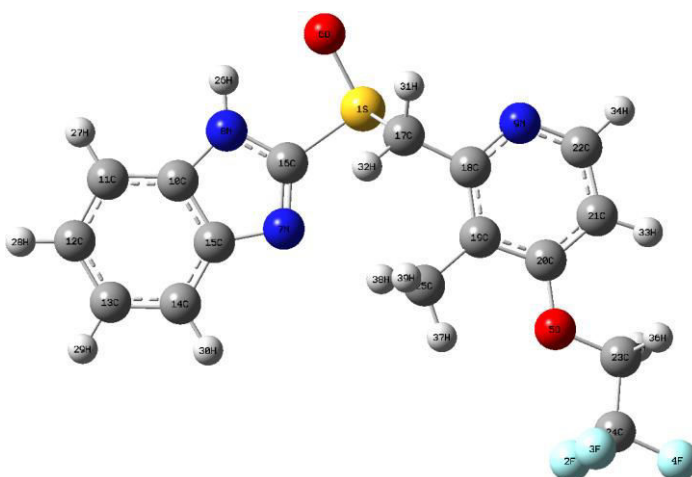

### Conformer 5

D1= -63.52218°, D2= 118.31458°  
D3= -102.95647°, D4= -96.81477°,  
Energy= -1630.09920707 a.u.

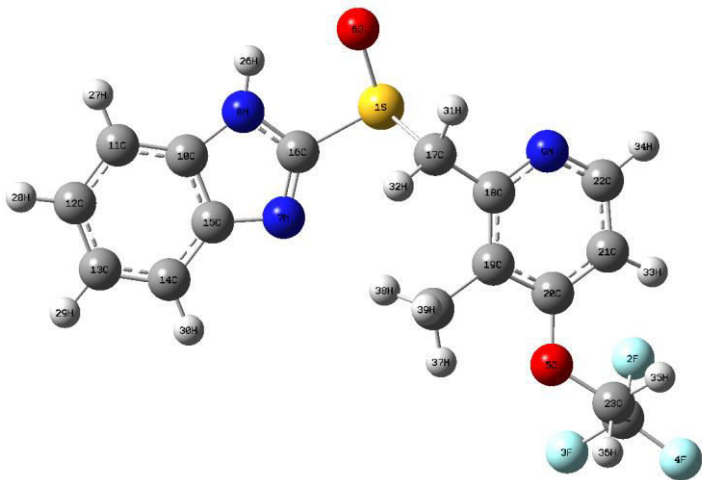

### Conformer 6

D1= -146.60983°, D2= -89.17417°  
D3= -88.51772°, D4= 99.01331°,  
Energy= -1630.10140877 a.u.

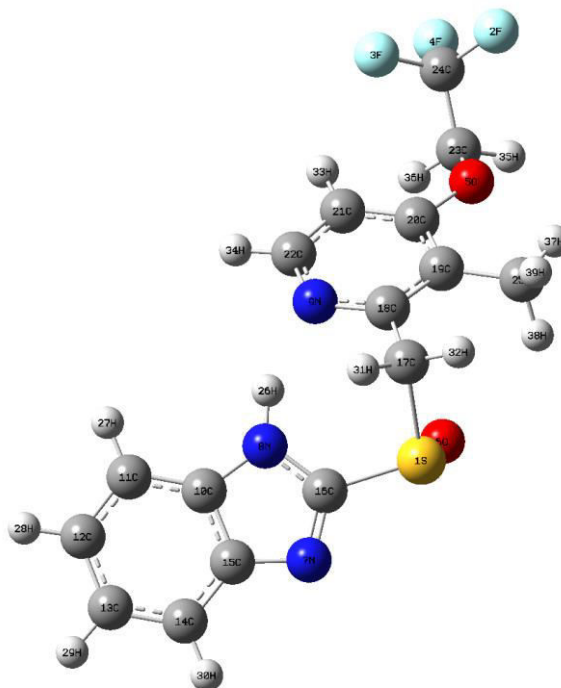

### Conformer 7

D1= -69.30829°, D2= -76.32036°  
D3= -83.04116°, D4= 99.94559°,  
Energy= -1630.10180096 a.u.

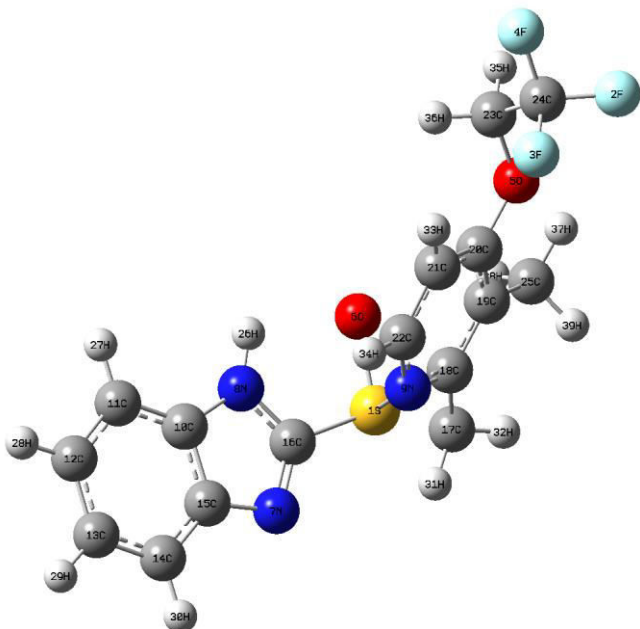

### Conformer 8

D1= -60.99464°, D2= 135.08909°  
D3= -86.30392°, D4= -94.99218°,  
Energy= -1630.09907528 a.u.

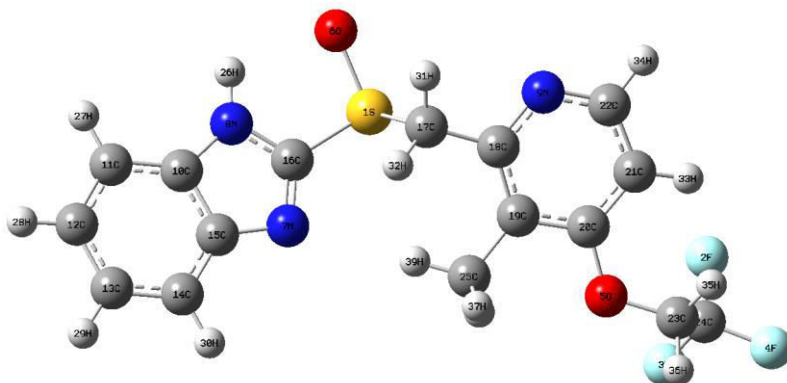

Conformer 9

D1= -84.47611°, D2= -130.29230°

D3= -27.27487°, D4= -94.47761°

Energy= -1630.08687659 a.u.

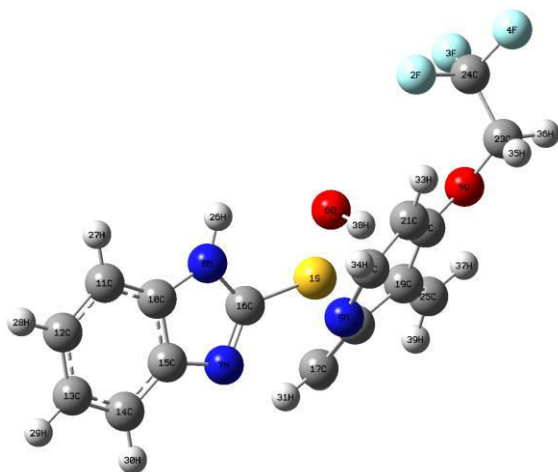

Conformer 10

D1= -82.66247°, D2= 61.00618°

D3= 79.43098°, D4= 96.32184°

Energy= -1630.09707468 a.u.

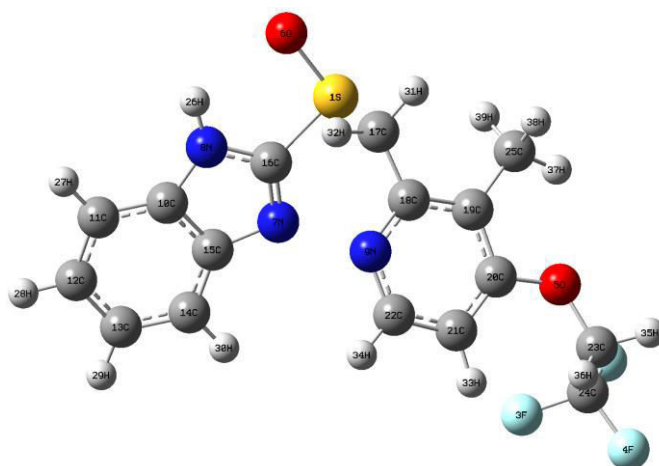

Conformer 11

D1= -65.61287°, D2= 173.55014°

D3= 88.70853°, D4= 96.07098°

Energy= -1630.10167194 a.u.

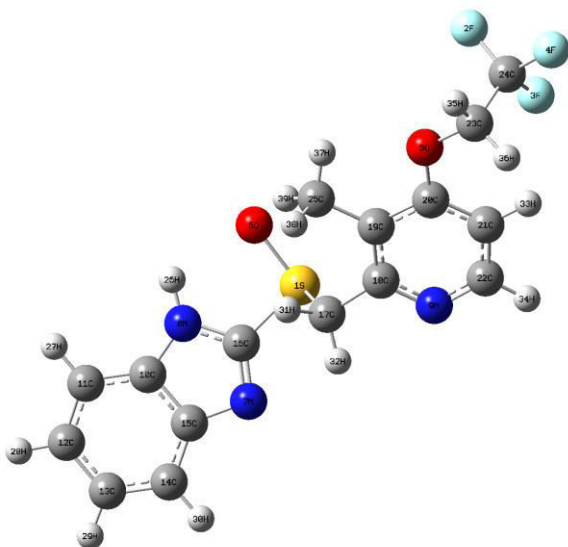

Conformer 12

D1= -66.03562°, D2= 174.01252°

D3= 89.40534°, D4= 179.55037°

Energy= -1630.10162461 a.u.

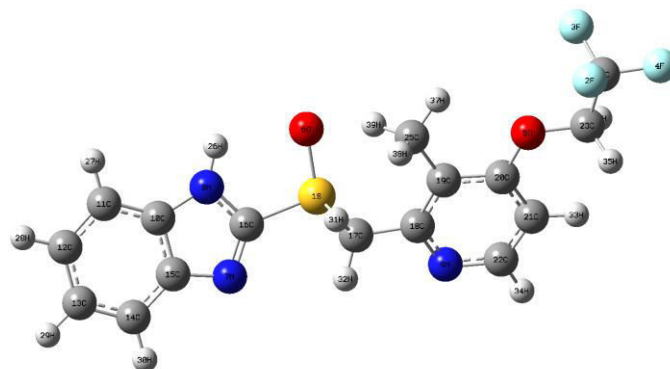

Conformer 13

D1= -63.81090°, D2= 117.57720°  
D3= -103.43550°, D4= 179.62235°  
Energy= -1630.09916404 a.u.

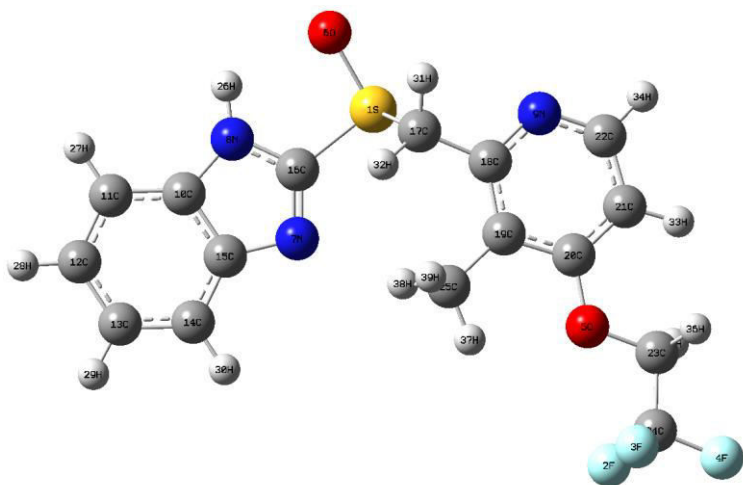

Conformer 14

D1= -71.67822°, D2= -86.09530°  
D3= 90.36915°, D4= 90.78730°  
Energy= -1630.09670008 a.u.

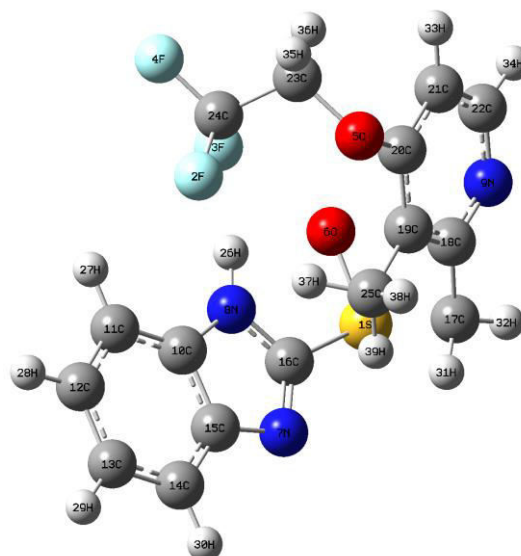

Fig. S5: Various possible conformers of LSP based on potential energy scan results



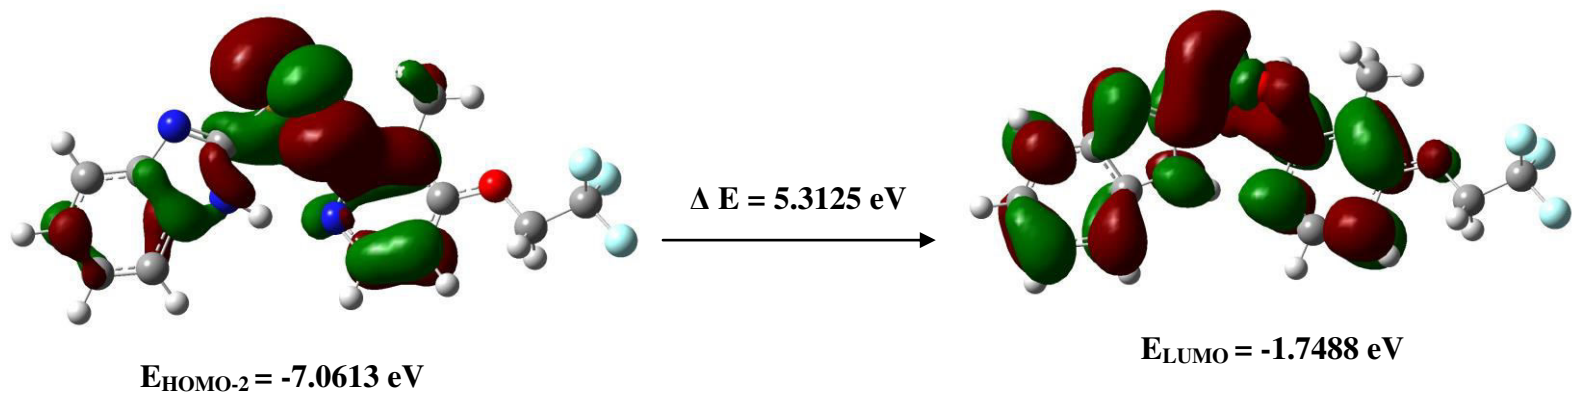

Fig. S6: The atomic orbital composition of the molecular orbitals and the electronic transitions for LSP

Table 1: Optimized geometrical parameters of LSP by DFT with B3LYP/6-311++G(d,p) method in comparison with XRD data.\*

| Geometrical parameters | Optimized Values | XRD Values | Geometrical Parameters | Optimized Values | XRD Values | Geometrical Parameters | Optimized Values | XRD Values |
|------------------------|------------------|------------|------------------------|------------------|------------|------------------------|------------------|------------|
| Bond Length(Å)         |                  |            | Bond Angles(°)         |                  |            | Dihedral Angles(°)     |                  |            |
| H27-C11                | 1.085            | 0.958      | C10-C11-C12            | 116.756          | 116.138    | C10-C11-C12-C13        | 0.056            | 0.219      |
| H28-C12                | 1.084            | 0.875      | C10-N8-C16             | 106.017          | 105.703    | C11-C12-C13-C14        | 0.131            | -0.155     |
| H29-C13                | 1.084            | 0.990      | C10-C15-N7             | 110.030          | 110.157    | C12-C13-C14-C15        | -0.129           | -0.791     |
| H30-C14                | 1.083            | 0.988      | C10-C15-C14            | 120.142          | 120.148    | C12-C13-C14-H30        | 179.983          | -179.981   |
| C10-C11                | 1.397            | 1.399      | C10-C11-H27            | 121.899          | 119.053    | C13-C14-C15-C10        | -0.053           | 1.668      |
| C11-C12                | 1.388            | 1.375      | C10-N8-H26             | 129.9079         | 140.806    | C13-C14-C15-N7         | 179.548          | -178.302   |
| C12-C13                | 1.411            | 1.393      | C11-C12-C13            | 121.727          | 122.103    | C14-C15-C10-N8         | 179.939          | 179.775    |
| C13-C14                | 1.387            | 1.368      | C11-C12-H28            | 119.192          | 121.305    | C15-C10-C11-C12        | -0.242           | 0.694      |
| C14-C15                | 1.400            | 1.399      | C11-C10-C15            | 122.120          | 122.3318   | C15-C10-C11-H27        | 179.858          | 177.743    |
| C10-C15                | 1.417            | 1.388      | C11-C10-N8             | 132.736          | 131.919    | C15-N7-C16-N8          | -0.182           | -0.298     |
| N8-H26                 | 1.027            | 0.794      | C12-C13-C14            | 121.405          | 121.516    | C15-N7-C16-S1          | -176.962         | -177.801   |
| N8-C10                 | 1.379            | 1.370      | C12-C13-H29            | 118.978          | 119.460    | N7-C16-N8-C10          | 0.354            | 0.155      |
| N8-C16                 | 1.371            | 1.345      | C13-C14-C15            | 117.847          | 117.740    | N7-C16-N8-H26          | 175.589          | 175.214    |
| N7-C16                 | 1.308            | 1.304      | C13-C14-H30            | 121.819          | 119.640    | C16-N8-C10-C11         | 179.290          | -178.291   |
| N7-C15                 | 1.385            | 1.391      | C14-C15-N7             | 129.825          | 129.694    | C16-S1-C17-C18         | -90.247          | -95.965    |
| C16-S1                 | 1.815            | 1.787      | C14-C13-H29            | 119.616          | 118.970    | N8-C10-C11-C12         | -179.838         | 178.822    |
| S1-O6                  | 1.513            | 1.492      | C15-N7-C16             | 104.393          | 103.055    | N8-C10-C11-H27         | 0.262            | -4.127     |
| S1-C17                 | 1.907            | 1.844      | N7-C16-N8              | 114.415          | 115.354    | C10-C15-N7-C16         | -0.059           | 0.328      |
| C17-H31                | 1.088            | 0.955      | C16-N8-H26             | 123.868          | 113.191    | N8-C16-S1-C17          | 41.584           | 70.407     |
| C17-H32                | 1.087            | 0.932      | C16-S1-O6              | 109.428          | 107.118    | N8-C16-S1-O6           | -68.439          | -40.521    |
| C17-C18                | 1.499            | 1.494      | C16-S1-C17             | 97.536           | 99.125     | S1-C17-C18-C19         | -92.058          | -93.495    |
| C18-C19                | 1.401            | 1.393      | S1-C16-N8              | 125.652          | 124.475    | S1-C17-C18-N9          | 86.808           | 85.476     |
| C19-C20                | 1.407            | 1.395      | S1-C17-C18             | 112.255          | 110.760    | O6-S1-C17-C18          | 22.533           | 15.153     |
| C20-C21                | 1.394            | 1.378      | S1-C17-H31             | 106.957          | 108.675    | C17-C18-C19-C20        | -179.123         | -178.053   |
| C21-C22                | 1.389            | 1.385      | C17-S1-O6              | 106.052          | 106.880    | C17-C18-N9-C22         | 179.478          | 179.341    |
| C22-N9                 | 1.329            | 1.325      | C17-C18-N9             | 115.633          | 114.275    | C18-C19-C20-C21        | -0.835           | -2.446     |
| N9-C18                 | 1.348            | 1.343      | C18-C19-C20            | 116.574          | 116.089    | C18-C19-C20-O5         | 179.239          | 177.213    |
| C22-H34                | 1.086            | 0.980      | C18-N9-C22             | 118.389          | 117.054    | C18-N9-C22-C21         | -0.044           | -0.343     |
| C21-H33                | 1.081            | 1.001      | C18-C19-C25            | 122.516          | 123.314    | C18-C19-C25-H39        | -61.194          | -68.720    |
| C19-C25                | 1.508            | 1.503      | C18-C17-H31            | 111.777          | 109.719    | C19-C20-C21-C22        | -0.701           | 0.662      |

|         |       |       |             |         |         |                 |          |          |
|---------|-------|-------|-------------|---------|---------|-----------------|----------|----------|
| C25-H37 | 1.087 | 0.938 | C19-C18-N9  | 123.421 | 124.379 | C19-C20-C21-H33 | -179.732 | -175.883 |
| C25-H38 | 1.093 | 0.925 | C19-C25-H37 | 111.017 | 113.055 | C19-C20-O5-C23  | 178.154  | -175.457 |
| C25-H39 | 1.094 | 0.939 | C19-C20-O5  | 116.266 | 115.380 | C20-C21-C22-N9  | 1.208    | 0.838    |
| C20-O5  | 1.363 | 1.369 | C20-C19-C25 | 120.899 | 120.590 | C20-C21-C22-H34 | -178.716 | -177.848 |
| O5-C23  | 1.411 | 1.410 | C20-O5-C23  | 119.041 | 117.289 | C20-O5-C23-C24  | 179.617  | 173.476  |
| C23-H35 | 1.095 | 0.976 | C20-C21-H33 | 122.535 | 122.489 | C20-O5-C23-H36  | 61.505   | 55.009   |
| C23-H36 | 1.095 | 0.872 | C21-C22-N9  | 123.453 | 124.068 | C20-O5-C23-H35  | -62.023  | -67.102  |
| C23-C24 | 1.520 | 1.480 | C21-C20-O5  | 123.474 | 123.931 | C22-N9-C18-C19  | -1.685   | -1.723   |
| C24-F2  | 1.343 | 1.325 | O5-C23-H35  | 111.766 | 111.901 | N9-C18-C19-C25  | -176.773 | -177.699 |
| C24-F3  | 1.345 | 1.317 | O5-C23-C24  | 107.451 | 106.915 | O5-C23-C24-F3   | -61.205  | -64.116  |
| C24-F4  | 1.352 | 1.326 | C23-C24-F2  | 112.327 | 113.373 | O5-C23-C24-F4   | 179.743  | 177.719  |

\* K. Vyas, A. Sivalakshmi and G. O. Reddy, Cryst. Struct. Commun., 2000, C56, e572-e573

Table S2: Observed and Calculated Normal frequencies of LSP with their Potential Energy Distribution

| DFT      |        | Obs   |      | Assignment (% PED)                                                                                                                                                                                                                                         |
|----------|--------|-------|------|------------------------------------------------------------------------------------------------------------------------------------------------------------------------------------------------------------------------------------------------------------|
| Unscaled | Scaled | Raman | IR   |                                                                                                                                                                                                                                                            |
| 3303     | 3154   |       | 3224 | $\nu(\text{N8H26})(99)$                                                                                                                                                                                                                                    |
| 3212     | 3072   | 3071  |      | $\nu(\text{C21H33})(97)$                                                                                                                                                                                                                                   |
| 3197     | 3058   |       | 3068 | $\nu(\text{C14H30})(68)+\nu(\text{C13H29})(22)+\nu(\text{C12H28})(7)$                                                                                                                                                                                      |
| 3189     | 3051   |       |      | $\nu(\text{C11H27})(45)+\nu(\text{C12H28})(34)+\nu(\text{C14H30})(18)$                                                                                                                                                                                     |
| 3179     | 3041   |       |      | $\nu(\text{C13H29})(44)+\nu(\text{C11H27})(37)+\nu(\text{C14H30})(12)+\nu(\text{C12H28})(7)$                                                                                                                                                               |
| 3167     | 3031   |       |      | $\nu(\text{C12H28})(51)+\nu(\text{C13H29})(30)+\nu(\text{C11H27})(14)$                                                                                                                                                                                     |
| 3159     | 3024   |       |      | $\nu(\text{C22H34})(70)+\nu(\text{C17H32})(16)+\nu(\text{C17H31})(12)$                                                                                                                                                                                     |
| 3158     | 3023   |       |      | $\nu(\text{C17H32})(40)+\nu(\text{C17H31})(31)+\nu(\text{C22H34})(27)$                                                                                                                                                                                     |
| 3150     | 3016   | 2986  | 2986 | $\nu(\text{C25H37})(89)+\nu(\text{C25H38})(7)$                                                                                                                                                                                                             |
| 3098     | 2969   | 2969  |      | $\nu(\text{C17H31})(56)+\nu(\text{C17H32})(42)$                                                                                                                                                                                                            |
| 3089     | 2961   |       | 2955 | $\nu(\text{C25H38})(65)+\nu(\text{C25H39})(32)$                                                                                                                                                                                                            |
| 3085     | 2957   | 2932  | 2932 | $\nu(\text{C23H35})(52)+\nu(\text{C23H36})(47)$                                                                                                                                                                                                            |
| 3033     | 2909   |       |      | $\nu(\text{C25H39})(62)+\nu(\text{C25H38})(24)+\nu(\text{C25H37})(7)$                                                                                                                                                                                      |
| 3032     | 2909   |       |      | $\nu(\text{C23H36})(49)+\nu(\text{C23H35})(44)+\nu(\text{C25H39})(5)$                                                                                                                                                                                      |
| 1656     | 1626   |       |      | $\nu(\text{C10C11})(21)+\nu(\text{C13C14})(13)+\nu(\text{C14C15})(13)+\nu(\text{C11C12})(8)+\nu(\text{N8C10})(7)+\delta_{\text{asym}}(\text{ring1})(6)+\delta_{\text{in}}(\text{C14H30})(5)+\delta_{\text{in}}(\text{C11H27})(5)+\delta'(\text{ring3})(5)$ |
| 1622     | 1593   | 1584  | 1580 | $\nu(\text{N9C22})(19)+\nu(\text{C19C20})(18)+\nu(\text{C21C22})(12)+\delta_{\text{in}}(\text{C22H34})(10)+\nu(\text{C18C19})(6)+\delta'_{\text{asym}}(\text{ring2})(5)$                                                                                   |
| 1616     | 1588   |       |      | $\nu(\text{C12C13})(15)+\nu(\text{C10C15})(15)+\nu(\text{C14C15})(13)+\nu(\text{C11C12})(8)+\delta_{\text{in}}(\text{C12H28})(7)+\nu(\text{C10C11})(7)$                                                                                                    |
| 1611     | 1583   |       |      | $\nu(\text{C20C21})(26)+\nu(\text{C18C19})(13)+\nu(\text{C21C22})(12)+\nu(\text{N9C18})(11)+\delta_{\text{in}}(\text{C21H33})(9)+\delta_{\text{asym}}(\text{ring2})(6)+\delta'_{\text{asym}}(\text{ring2})(5)$                                             |
| 1536     | 1511   |       |      | $\delta_{\text{in}}(\text{N8H26})(27)+\delta_{\text{in}}(\text{C13H29})(17)+\nu(\text{C11C12})(11)+\nu(\text{C13C14})(9)+\nu(\text{C14C15})(6)$                                                                                                            |
| 1511     | 1487   | 1495  |      | $\delta'_{\text{asym}}(\text{C25H}_3)(33)+\delta_{\text{in}}(\text{C22H34})(13)+\delta_{\text{in}}(\text{C21H33})(8)+\text{S}(\text{C23H}_2)(7)+\nu(\text{C19C20})(7)+\nu(\text{N9C22})(5)$                                                                |
| 1505     | 1482   |       | 1475 | $\delta'_{\text{asym}}(\text{C25H}_3)(17)+\nu(\text{N7C16})(15)+\text{S}(\text{C23H}_2)(9)+\delta_{\text{asym}}(\text{C25H}_3)(9)+\nu(\text{C10C11})(8)+\nu(\text{C13C14})(6)+\delta_{\text{in}}(\text{C12H28})(5)$                                        |
| 1504     | 1480   |       |      | $\delta'_{\text{asym}}(\text{C25H}_3)(14)+\nu(\text{N7C16})(14)+\text{S}(\text{C23H}_2)(13)+\delta_{\text{asym}}(\text{C25H}_3)(12)+\nu(\text{C10C11})(7)+\nu(\text{C13C14})(5)$                                                                           |

|      |      |      |      |                                                                                                                                                                                         |
|------|------|------|------|-----------------------------------------------------------------------------------------------------------------------------------------------------------------------------------------|
| 1498 | 1474 |      |      | S(C23H <sub>2</sub> )(45)+ δ <sub>asym</sub> (C25H <sub>3</sub> )(41)                                                                                                                   |
| 1487 | 1464 | 1468 |      | S(C23H <sub>2</sub> )(24)+ δ <sub>asym</sub> (C25H <sub>3</sub> )(15)+ δ' <sub>asym</sub> (C25H <sub>3</sub> )(9)+δ <sub>in</sub> (C21H33)(9)+<br>S(C17H <sub>2</sub> )(7)+v(C19C20)(6) |
| 1476 | 1453 |      | 1456 | S(C17H <sub>2</sub> )(61)+v(C17C18)(8)+v(C18C19)(7)                                                                                                                                     |
| 1461 | 1439 | 1436 |      | v(N7C16)(38)+v(N8C16)(16)+δ <sub>in</sub> (C12H28)(9)+δ <sub>in</sub> (N8H26)(9)+δ <sub>in</sub> (C11H27)(5)                                                                            |
| 1449 | 1427 |      |      | δ <sub>in</sub> (N8H26)(17)+δ <sub>in</sub> (C14H30)(13)+v(C11C12)(7)+v(C10C15)(7)+v(C14C15)(5)+δ <sub>in</sub> (<br>C13H29)(5)+δ <sub>in</sub> (C22H34)(5)                             |
| 1440 | 1419 |      |      | ω(C23H <sub>2</sub> )(58)+v(C23C24)(15)                                                                                                                                                 |
| 1438 | 1417 |      |      | v(C18C19)(14)+S(C17H <sub>2</sub> )(13)+δ <sub>in</sub> (C22H34)(12)+δ <sub>in</sub> (N8H26)(6)+ω(C23H <sub>2</sub> )(6)<br>+δ' <sub>asym</sub> (C25H <sub>3</sub> )(6)+v(N9C18)(5)     |
| 1411 | 1391 | 1402 | 1402 | δ <sub>sym</sub> (C25H <sub>3</sub> )(85)+v(C19C25)(7)                                                                                                                                  |
| 1383 | 1364 | 1362 |      | v(C12C13)(17)+v(C14C15)(13)+v(C10C15)(10)+v(C13C14)(10)+v(C10C11)(8)+v(N<br>8C16)(7)+δ <sub>in</sub> (C12H28)(7)+v(C11C12)(7)+δ <sub>in</sub> (C13H29)(6)+δ'(ring3)(5)                  |
| 1329 | 1312 | 1308 | 1310 | v(O5C20)(22)+v(N9C22)(18)+v(C20C21)(12)+δ <sub>tri</sub> (ring2)(9)+v(C18C19)(5)+<br>v(N9C18)(5)+δ <sub>in</sub> (C21H33)(5)                                                            |
| 1319 | 1302 |      | 1300 | δ <sub>in</sub> (C11H27)(21)+v(N8C10)(13)+v(C11C12)(11)+δ <sub>in</sub> (C13H29)(10)+<br>δ <sub>in</sub> (C12H28)(7)+ δ <sub>tri</sub> (ring1)(7)+δ <sub>in</sub> (C14H30)(6)           |
| 1307 | 1290 |      |      | (N9C22)(19)+v(C21C22)(12)+v(C19C20)(11)+δ <sub>in</sub> (C22H34)(9)+v(O5C20)(8)+v <sub>asym</sub> (F<br>2C24)(5)+t(C23H <sub>2</sub> )(5)                                               |
| 1306 | 1289 |      | 1283 | t(C23H <sub>2</sub> )(60)+v <sub>asym</sub> (F3C24)(13)+v(F2C24)(9)                                                                                                                     |
| 1290 | 1274 | 1272 |      | v(N7C15)(21)+v(N8C10)(15)+v(C10C15)(14)+v(C13C14)(11)+<br>δ <sub>in</sub> (C14H30)(10)+δ <sub>in</sub> (C13H29)(6)+ δ(ring3)(6)+v(C11C12)(6)                                            |
| 1284 | 1268 |      | 1265 | v(N9C18)(24)+δ <sub>in</sub> (C22H34)(17)+v <sub>asym</sub> (C17C18)(10)+t(C17H <sub>2</sub> )(9)+v(C19C20)(7)+v(<br>C20C21)(7)                                                         |
| 1265 | 1250 |      | 1252 | v(C23C24)(18)+ δ <sub>sym</sub> (C24F <sub>3</sub> )(18)+ω(C23H <sub>2</sub> )(14)+v <sub>asym</sub> (F3C24)(10)<br>+v <sub>asym</sub> (F2C24)(10)+v(O5C20)(9)                          |
| 1252 | 1238 |      |      | ω(C17H <sub>2</sub> )(29)+v(N7C15)(18)+v(C10C11)(6)+ δ <sub>tri</sub> (ring1)(5)+δ <sub>in</sub> (C14H30)(5)                                                                            |
| 1245 | 1231 | 1229 |      | ω(C17H <sub>2</sub> )(40)+v(N7C15)(13)+ δ <sub>tri</sub> (ring1)(7)                                                                                                                     |
| 1211 | 1197 | 1196 | 1198 | v(C19C25)(28)+ δ <sub>tri</sub> (ring2)(18)+δ <sub>in</sub> (C21H33)(18)+v(C20C21)(11)                                                                                                  |
| 1203 | 1190 |      |      | v(N8C16)(37)+δ <sub>in</sub> (N8H26)(11)+v(N8C10)(10)+v(S1C16)(7)+δ <sub>in</sub> (C12H28)(6)+δ <sub>tri</sub><br>(ring1)(5)                                                            |

|      |      |      |      |                                                                                                                                                                                                                                         |
|------|------|------|------|-----------------------------------------------------------------------------------------------------------------------------------------------------------------------------------------------------------------------------------------|
| 1176 | 1164 | 1162 | 1163 | $t(\text{C17H}_2)(30)+\omega(\text{C17H}_2)(10)+v(\text{O5C23})(8)+\delta_{\text{in}}(\text{C21H33})(7)+\delta_{\text{tri}}(\text{ring2})(6)+\rho(\text{C25H}_3)(6)$                                                                    |
| 1171 | 1159 |      |      | $\rho(\text{C23H}_2)(27)+v(\text{F2C24})(21)+v_{\text{asym}}(\text{F3C24})(20)+t(\text{C23H}_2)(14)+\delta'_{\text{asym}}(\text{C24F}_3)(7)+\rho(\text{C24F}_3)(7)$                                                                     |
| 1168 | 1156 |      |      | $\delta_{\text{in}}(\text{C12H28})(25)+\delta_{\text{in}}(\text{C13H29})(18)+\delta_{\text{in}}(\text{C11H27})(13)+v(\text{C12C13})(10)+\delta_{\text{in}}(\text{C14H30})(9)+v(\text{N8C10})(5)+v(\text{N7C15})(5)$                     |
| 1148 | 1137 | 1142 |      | $v(\text{F4C24})(55)+\delta_{\text{asym}}(\text{C24F}_3)(12)+v_{\text{asym}}(\text{F3C24})(7)+\rho'(\text{C24F}_3)(6)+v_{\text{asym}}(\text{F2C24})(6)+S(\text{C23C24O5})(6)$                                                           |
| 1135 | 1124 |      |      | $\delta_{\text{in}}(\text{C13H29})(16)+\delta_{\text{in}}(\text{C14H30})(15)+v(\text{C13C14})(14)+v(\text{C11C12})(13)+\delta_{\text{tri}}(\text{ring1})(12)+\delta_{\text{in}}(\text{C11H27})(9)+\delta_{\text{in}}(\text{C12H28})(8)$ |
| 1132 | 1121 | 1115 | 1117 | $v(\text{O5C23})(35)+v(\text{C21C22})(9)+\delta_{\text{in}}(\text{C21H33})(9)+v(\text{C17C18})(7)+\delta_{\text{in}}(\text{O5C20})(6)+t(\text{C17H}_2)(5)$                                                                              |
| 1098 | 1088 | 1086 | 1088 | $t(\text{C17H}_2)(37)+v(\text{N9C18})(13)+v(\text{C21C22})(11)+v(\text{N9C22})(6)+\delta_{\text{in}}(\text{C21H33})(6)+\delta_{\text{tri}}(\text{ring2})(5)+\delta_{\text{in}}(\text{C17C18})(5)$                                       |
| 1058 | 1049 |      |      | $\rho(\text{C25H}_3)(38)+v(\text{O5C23})(27)+v_{\text{asym}}(\text{C17C18})(6)+v(\text{O5C20})(5)$                                                                                                                                      |
| 1055 | 1046 |      | 1038 | $\rho'(\text{C25H}_3)(73)+\omega(\text{C19C25})(9)+\delta_{\text{asym}}(\text{C25H}_3)(6)+\delta_{\text{puck}}(\text{ring2})(5)$                                                                                                        |
| 1031 | 1022 | 1046 |      | $v(\text{S1O6})(88)$                                                                                                                                                                                                                    |
| 1026 | 1018 | 1008 | 1003 | $v(\text{C12C13})(40)+v(\text{C13C14})(12)+\delta_{\text{in}}(\text{C14H30})(12)+v(\text{C11C12})(12)+\delta_{\text{in}}(\text{C11H27})(11)$                                                                                            |
| 981  | 974  |      | 970  | $\rho(\text{C23H}_2)(44)+v_{\text{asym}}(\text{F2C24})(20)+v(\text{F3C24})(20)+t(\text{C23H}_2)(5)$                                                                                                                                     |
| 976  | 969  | 965  |      | $\omega(\text{C13H29})(38)+\omega(\text{C12H28})(25)+\omega(\text{C14H30})(19)+\delta_{\text{puck}}(\text{ring1})(10)+\omega(\text{C11H27})(5)$                                                                                         |
| 970  | 963  |      |      | $\delta(\text{ring3})(40)+\delta'(\text{ring3})(19)+v(\text{C10C15})(11)+v(\text{S1C16})(8)+v(\text{N8C16})(7)$                                                                                                                         |
| 962  | 955  |      |      | $\omega(\text{C22H34})(69)+\omega(\text{C21H33})(16)+\delta_{\text{puck}}(\text{ring2})(6)$                                                                                                                                             |
| 944  | 938  |      |      | $\omega(\text{C12H28})(31)+\omega(\text{C14H30})(30)+\omega(\text{C11H27})(25)+\tau'_{\text{asym}}(\text{ring1})(7)+\omega(\text{C13H29})(5)$                                                                                           |
| 933  | 927  | 923  | 922  | $\rho(\text{C25H}_3)(21)+v(\text{C17C18})(11)+v(\text{O5C20})(10)+v(\text{C19C20})(7)+\rho(\text{C17H}_2)(7)+v(\text{C18C19})(7)+v(\text{O5C23})(5)+v(\text{C20C21})(5)$                                                                |
| 907  | 901  | 897  |      | $\delta_{\text{tri}}(\text{ring1})(56)+v(\text{N7C15})(8)+\delta'(\text{ring3})(8)+v(\text{N8C10})(6)+\delta_{\text{asym}}(\text{ring1})(6)$                                                                                            |
| 881  | 876  | 880  |      | $\rho(\text{C17H}_2)(67)+\tau(\text{S1C17})(6)$                                                                                                                                                                                         |
| 858  | 853  | 859  | 858  | $v(\text{C23C24})(19)+v(\text{F3C24})(17)+v(\text{F2C24})(16)+S(\text{C23C24O5})(8)+\delta(\text{C20O5C23})(7)+\delta_{\text{tri}}(\text{ring2})(5)+v(\text{C17C18})(5)$                                                                |
| 855  | 850  |      |      | $\omega(\text{C11H27})(34)+\omega(\text{C14H30})(24)+\omega(\text{C13H29})(15)+\delta_{\text{puck}}(\text{ring1})(10)+\tau_{\text{asym}}(\text{ring1})(5)$                                                                              |
| 850  | 846  | 842  | 841  | $\delta_{\text{tri}}(\text{ring2})(26)+\delta'_{\text{asym}}(\text{ring2})(16)+v(\text{C19C25})(12)+\delta_{\text{asym}}(\text{ring2})(7)$                                                                                              |

|     |     |     |     |                                                                                                                                                                                                                                                                    |
|-----|-----|-----|-----|--------------------------------------------------------------------------------------------------------------------------------------------------------------------------------------------------------------------------------------------------------------------|
| 821 | 817 |     | 814 | $\omega(\text{C21H33})(52) + \delta_{\text{puck}}(\text{ring2})(17) + \omega(\text{O5C20})(13) + \omega(\text{C22H34})(6)$                                                                                                                                         |
| 814 | 811 |     |     | $v(\text{C10C15})(19) + v(\text{C14C15})(16) + v(\text{C10C11})(16) + \delta'_{\text{asym}}(\text{ring1})(10) + v(\text{N8C10})(8) + v(\text{N7C15})(6) + v(\text{S1C16})(5)$                                                                                      |
| 810 | 807 | 803 | 800 | $\omega(\text{N8H26})(65) + \delta_{\text{puck}}(\text{ring2})(8)$                                                                                                                                                                                                 |
| 784 | 781 |     |     | $\delta_{\text{puck}}(\text{ring2})(37) + \omega(\text{C17C18})(20) + \omega(\text{C22H34})(8) + \omega(\text{C19C25})(6) + S(\text{C17C18S1})(6)$                                                                                                                 |
| 772 | 769 | 774 | 768 | $\delta_{\text{puck}}(\text{ring1})(46) + \tau(\text{ring3})(28) + \omega(\text{C12H28})(10) + \omega(\text{N8H26})(5)$                                                                                                                                            |
| 752 | 749 |     | 748 | $\omega(\text{C13H29})(27) + \omega(\text{C11H27})(18) + \omega(\text{C12H28})(16) + \omega(\text{C14H30})(11) + \delta_{\text{puck}}(\text{ring1})(10) + \tau'(\text{ring3})(7)$                                                                                  |
| 742 | 739 | 739 |     | $\delta_{\text{puck}}(\text{ring2})(17) + v(\text{C19C25})(9) + \delta(\text{C20O5C23})(6) + v_{\text{asym}}(\text{C17C18})(6) + v(\text{C18C19})(6) + v(\text{C20C21})(5) + v(\text{F4C24})(5) + \omega(\text{O5C20})(5) + \delta_{\text{sym}}(\text{C24F}_3)(5)$ |
| 682 | 681 | 676 | 677 | $\omega(\text{O5C20})(23) + S(\text{C17C18S1})(8) + \delta_{\text{puck}}(\text{ring2})(8) + \tau'(\text{ring3})(8) + \omega(\text{C17C18})(6) + \omega(\text{S1O6})(6) + \tau_{\text{asym}}(\text{ring2})(6)$                                                      |
| 676 | 674 |     |     | $\tau'(\text{ring3})(33) + \omega(\text{N8H26})(15) + \omega(\text{S1C16})(14) + \tau(\text{ring3})(13)$                                                                                                                                                           |
| 649 | 648 | 658 | 658 | $\delta_{\text{sym}}(\text{C24F}_3)(26) + \omega(\text{O5C20})(9) + v(\text{S1C17})(8) + \omega(\text{C17C18})(6) + v(\text{F4C24})(6) + \delta_{\text{asym}}(\text{ring2})(5) + S(\text{C23C24O5})(5) + v(\text{C19C25})(5)$                                      |
| 630 | 629 |     | 636 | $\delta'(\text{ring3})(31) + \delta_{\text{asym}}(\text{ring1})(22) + \delta(\text{ring3})(13) + \delta'_{\text{asym}}(\text{ring1})(12) + v(\text{C14C15})(8) + v(\text{C10C11})(8)$                                                                              |
| 598 | 597 | 608 | 615 | $\delta'_{\text{asym}}(\text{ring1})(19) + v(\text{S1C17})(17) + \delta'_{\text{asym}}(\text{ring2})(12) + \delta_{\text{asym}}(\text{ring1})(7) + \delta_{\text{asym}}(\text{ring2})(7) + v(\text{S1C16})(6)$                                                     |
| 589 | 589 | 589 |     | $\delta'_{\text{asym}}(\text{ring1})(20) + \delta_{\text{asym}}(\text{ring1})(12) + \delta'_{\text{asym}}(\text{ring2})(10) + v(\text{S1C17})(8) + \omega(\text{S1O6})(8) + \delta_{\text{asym}}(\text{ring2})(6) + v(\text{S1C16})(5)$                            |
| 583 | 583 |     |     | $\delta_{\text{puck}}(\text{ring1})(30) + \tau_{\text{asym}}(\text{ring1})(21) + \tau'(\text{ring3})(13) + \tau(\text{ring3})(6) + \tau'_{\text{asym}}(\text{ring1})(6) + \omega(\text{C13H29})(5)$                                                                |
| 576 | 575 |     | 577 | $\delta_{\text{asym}}(\text{C24F}_3)(19) + \delta_{\text{in}}(\text{O5C20})(13) + \delta_{\text{asym}}(\text{ring2})(10) + \delta_{\text{sym}}(\text{C24F}_3)(9) + \delta(\text{C20O5C23})(8) + \rho'(\text{C24F}_3)(6)$                                           |
| 563 | 562 | 566 | 565 | $\tau_{\text{asym}}(\text{ring2})(21) + \omega(\text{O5C20})(15) + v(\text{S1C17})(15) + \delta_{\text{puck}}(\text{ring2})(10) + \tau'_{\text{asym}}(\text{ring2})(7) + \omega(\text{C19C25})(6) + S(\text{C17C18S1})(5)$                                         |
| 533 | 533 | 529 | 528 | $\delta'_{\text{asym}}(\text{C24F}_3)(30) + \delta_{\text{asym}}(\text{ring2})(15) + \delta_{\text{asym}}(\text{C24F}_3)(8)$                                                                                                                                       |
| 532 | 532 |     |     | $\delta'_{\text{asym}}(\text{C24F}_3)(40) + \delta_{\text{asym}}(\text{ring2})(11) + \delta_{\text{asym}}(\text{C24F}_3)(6)$                                                                                                                                       |
| 511 | 512 | 512 | 513 | $\delta_{\text{in}}(\text{C17C18})(12) + \delta_{\text{asym}}(\text{C24F}_3)(11) + \delta_{\text{in}}(\text{C19C25})(11) + \delta_{\text{in}}(\text{O5C20})(10) + \tau(\text{S1C17})(8) + \delta'_{\text{asym}}(\text{ring2})(8) + \rho(\text{C17H}_2)(7)$         |

|     |     |     |     |                                                                                                                                                                           |
|-----|-----|-----|-----|---------------------------------------------------------------------------------------------------------------------------------------------------------------------------|
| 505 | 505 |     |     | $\delta_{in}(S1C16)(17)+\omega(S1O6)(14)+\delta_{asym}(ring1)(9)+\delta_{asym}(C24F_3)(9)+\delta'_{asym}(ring1)(8)$                                                       |
| 488 | 488 | 494 | 492 | $\tau'_{asym}(ring2)(29)+v(S1C17)(18)+\omega(C19C25)(15)+\omega(C17C18)(8)+\delta'_{asym}(ring2)(5)$                                                                      |
| 444 | 444 | 448 | 447 | $\tau'_{asym}(ring1)(28)+\tau(C10C15)(25)+\tau_{asym}(ring1)(15)+\delta(C16S1C17)(5)+\omega(S1O6)(5)$                                                                     |
| 413 | 414 |     |     | $\omega(S1O6)(29)+\tau'_{asym}(ring1)(16)+v(S1C16)(9)+\delta_{asym}(ring1)(9)$                                                                                            |
| 408 | 409 | 408 | 415 | $\delta_{in}(C19C25)(16)+\delta_{asym}(C24F_3)(15)+\rho'(C24F_3)(14)+\delta_{in}(C17C18)(7)+\tau(S1C17)(5)+\delta(C20O5C23)(5)+\rho(C24F_3)(5)$                           |
| 382 | 383 | 394 | 403 | $\rho(S1O6)(17)+\tau(S1C17)(9)+\omega(S1O6)(7)+\omega(C19C25)(6)+\delta_{in}(C17C18)(5)+\delta_{in}(C19C25)(5)+\tau'_{asym}(ring2)(5)$                                    |
| 371 | 372 |     |     | $\delta(C16S1C17)(30)+\tau(S1C17)(25)+\delta_{in}(C17C18)(9)+\tau(C17C18)(6)+\delta_{in}(C19C25)(5)+\tau'_{asym}(ring1)(5)$                                               |
| 364 | 365 |     |     | $\rho(C24F_3)(50)+\rho'(C24F_3)(18)+\delta'_{asym}(C24F_3)(16)+\rho(C23H_2)(6)$                                                                                           |
| 331 | 332 |     |     | $v(S1C16)(17)+\delta_{in}(C17C18)(15)+\tau'_{asym}(ring1)(11)+\tau(C10C15)(8)+\delta_{in}(C19C25)(8)+\delta(C16S1C17)(6)+\omega(S1C16)(6)+\tau(S1C17)(5)+\omega(S1O6)(5)$ |
| 294 | 295 |     |     | $\omega(C19C25)(29)+\omega(O5C20)(13)+\omega(C17C18)(10)+\omega(C21H33)(6)+\omega(S1O6)(6)+\tau(O5C20)(6)+\tau'_{asym}(ring2)(5)$                                         |
| 266 | 267 | 271 |     | $\delta_{in}(C19C25)(17)+\rho'(C24F_3)(16)+\delta_{in}(O5C20)(8)+v(O5C23)(7)+\delta_{asym}(C24F_3)(5)+\rho(C24F_3)(5)$                                                    |
| 258 | 259 | 250 |     | $\tau_{asym}(ring1)(35)+\tau(C10C15)(16)+\omega(N8H26)(14)+\tau'(ring3)(10)+\tau(ring3)(6)+\tau(S1C16)(6)+\tau'_{asym}(ring1)(6)+\delta_{puck}(ring1)(5)$                 |
| 238 | 239 |     |     | $\tau_{asym}(ring2)(27)+\omega(S1O6)(10)+\tau'_{asym}(ring2)(9)+\delta(C16S1C17)(5)$                                                                                      |
| 213 | 214 | 215 |     | $\rho(S1O6)(33)+\tau(C10C15)(11)+v(S1C16)(9)+\tau_{asym}(ring2)(7)+\omega(S1C16)(6)$                                                                                      |
| 205 | 206 |     |     | $S(C23C24O5)(16)+\delta(C20O5C23)(11)+\tau(S1C17)(11)+\rho'(C24F_3)(9)+\delta_{in}(O5C20)(8)+v(C23C24)(6)+\tau(C10C15)(5)$                                                |
| 180 | 181 | 184 |     | $\delta(C16S1C17)(39)+\omega(S1O6)(14)+\delta_{in}(S1C16)(12)+\tau(C10C15)(9)$                                                                                            |
| 153 | 154 |     |     | $\tau(O5C20)(30)+\tau(C23C24)(26)+\tau'_{asym}(ring2)(10)+\tau_{asym}(ring2)(5)+\tau(O5C23)(5)$                                                                           |
| 130 | 131 |     |     | $\tau(S1C17)(26)+\delta_{in}(S1C16)(21)+\delta(C16S1C17)(9)$                                                                                                              |
| 117 | 118 |     |     | $\tau(S1C17)(19)+S(C17C18S1)(16)+\omega(S1O6)(9)+\tau(C23C24)(9)+\tau'_{asym}(ring2)(6)+\delta_{in}(S1C16)(5)+\tau_{asym}(ring2)(5)$                                      |
| 113 | 113 |     |     | $\tau(C19C25)(76)$                                                                                                                                                        |
| 87  | 87  |     |     | $S(C23C24O5)(15)+\omega(S1C16)(12)+\delta(C20O5C23)(9)+\delta_{in}(S1C16)(9)+\omega(S1O6)(8)+\tau(C17C18)(6)+\tau(C10C15)(6)+\tau(S1C17)(5)$                              |



|    |    |  |  |                                                                                                                                                                                     |
|----|----|--|--|-------------------------------------------------------------------------------------------------------------------------------------------------------------------------------------|
| 67 | 67 |  |  | $\tau(\text{S1C17})(24)+\tau(\text{S1C16})(16)+\text{S}(\text{C17C18S1})(10)+\omega(\text{S1C16})(7)+\delta(\text{C16S1C17})(5)+\omega(\text{S1O6})(5)$                             |
| 64 | 65 |  |  | $\omega(\text{N8H26})(24)+\tau(\text{S1C16})(13)+\tau(\text{C19C25})(8)+\omega(\text{S1C16})(7)+\delta(\text{C16S1C17})(6)+\tau(\text{O5C23})(6)+\text{asym}\tau'(\text{ring2})(5)$ |
| 54 | 54 |  |  | $\tau(\text{S1C16})(30)+\omega(\text{N8H26})(24)+\tau(\text{C17C18})(16)+\tau(\text{O5C23})(8)$                                                                                     |
| 44 | 44 |  |  | $\tau(\text{S1C16})(32)+\omega(\text{N8H26})(24)+\tau(\text{O5C23})(10)+\tau(\text{O5C20})(7)+\tau(\text{C17C18})(6)+\text{S}(\text{C17C18S1})(5)$                                  |
| 38 | 38 |  |  | $\tau(\text{C23C24})(23)+\tau(\text{S1C16})(20)+\tau(\text{O5C20})(19)+\omega(\text{N8H26})(11)+\tau(\text{O5C23})(6)+\tau(\text{S1C17})(5)$                                        |
| 27 | 27 |  |  | $\tau(\text{S1C17})(37)+\tau(\text{S1C16})(19)+\tau(\text{O5C23})(14)+\tau(\text{O5C20})(10)+\text{S}(\text{C17C18S1})(6)$                                                          |
| 14 | 15 |  |  | $\tau(\text{S1C16})(30)+\tau(\text{S1C17})(29)+\tau(\text{C17C18})(13)+\tau(\text{O5C20})(6)+\tau(\text{O5C23})(5)+\delta(\text{C16S1C17})(5)$                                      |

**Note:** All wavenumbers are in  $\text{cm}^{-1}$ . Vibrations with PED contribution  $\geq 5$  are included. Types of vibration:  $\nu_{\text{sym}}$ ,  $\nu_{\text{asym}}$  symmetric and asymmetric stretching;  $\delta$ , deformation;  $\delta_{\text{sym}}$ ,  $\delta_{\text{asym}}$ ,  $\delta'_{\text{asym}}$ , symmetric, asymmetric and asymmetric deformation;  $\delta_{\text{in}}$ ,  $\delta_{\text{oop}}$  in plane and out of plane bending;  $\omega$  wagging;  $\delta_{\text{sciss}}$ , scissoring;  $\rho$ ,  $\rho'$  rocking and rocking';  $\tau$ , torsion;  $\tau_{\text{asym}}$ ,  $\tau'_{\text{asym}}$  asymmetric and asymmetric torsion;  $\delta_{\text{tri}}$ , trigonal deformation; and  $\delta_{\text{puck}}$ , Puckring.

Table S3: Calculated absorption wavelength, energy and oscillator strength of electronic transition in LSP in gas phase and solvent

|           | Excitation Transition |       | $\lambda$ (nm)   |        | E(ev)  | Oscillator strength (f) | Transition type/ assignments |
|-----------|-----------------------|-------|------------------|--------|--------|-------------------------|------------------------------|
|           |                       |       | Exp <sup>a</sup> | Cal    |        |                         |                              |
| Gas Phase | 93→96                 | H-2→L | -                | 286.79 | 4.3232 | 0.0373                  | $\pi \rightarrow \pi^*$      |
| Ethanol   | 93→96                 | H-2→L | 284              | 287.10 | 4.3185 | 0.0794                  | $\pi \rightarrow \pi^*$      |

Table S4: Comparison between calculated and experimental  $^1\text{H}$  NMR chemical shifts (ppm) for LSP

| Atom no. | Chemical Shifts (ppm) |             | Atom no. | Chemical Shifts (ppm) |             |
|----------|-----------------------|-------------|----------|-----------------------|-------------|
|          | Cal                   | Exp         |          | Cal                   | Exp         |
| H(26)    | 13.281                | 11.882      | H(33)    | 6.464                 | 6.659       |
| H(27)    | 7.595                 | 7.264-7.797 | H(34)    | 8.68                  | 8.343       |
| H(28)    | 7.453                 |             | H(35)    | 4.111                 | 4.315-4.393 |
| H(29)    | 7.372                 |             | H(36)    | 4.117                 |             |
| H(30)    | 7.960                 |             | H(37)    | 3.051                 |             |
| H(31)    | 4.278                 | 4.721-4.864 | H(38)    | 2.372                 | 2.196       |
| H(32)    | 4.543                 |             | H(39)    | 1.849                 |             |
